# Supplementary material
Source: Copernicus journal article supplement (doi:10.5194/egusphere-2026-2818)
Supplement: Supplementary file 2 [file SupplementaryMaterial.pdf › SupplementaryMaterial.pdf]

# SUPPLEMENTARY MATERIALS

Macro constraints and local eutrophication shape sediment nitrogen removal in the  
Eastern China Plain lakes

Jiahao Wei<sup>1, 2</sup>, Ke Yang<sup>1 3</sup>, Yaru Liu<sup>2</sup>, Yi Yin<sup>4</sup>, Lachun Wang<sup>2</sup>, Enlou Zhang<sup>1, 3</sup>, Zhijun  
Gong<sup>1, 3</sup>, Yongjiu Cai<sup>1, 3\*</sup>

1 State Key Laboratory of Lake and Watershed Science for Water Security, Nanjing Institute of Geography and  
Limnology, Chinese Academy of Sciences, Nanjing 211135, China

2 School of Geography and Ocean Science, Nanjing University, Nanjing 210023, China

3 University of Chinese Academy of Sciences, Beijing 100049, China

4 School of Life Sciences, Fudan University, Shanghai 200433, China

*Correspondence to:* Yongjiu Cai (caiyl@niglas.ac.cn)

## **Supplementary Methods**

**Method S1** Overview of the Eastern China Plain lakes region

**Method S2** Calculation formula for the Comprehensive Trophic Level Index (TLI)

**Method S3** Land use data sources, preprocessing, and calculations for the Human Activity Intensity (HAI)

**Method S4** Detailed protocol for isotope slurry incubations, calculation principles, and formulas

## **Supplementary Figure**

**Figure S1** Human activity intensity within 2-km and 5-km buffer zones surrounding the Eastern China Plain lakes

**Figure S2** Water quality parameters of the Eastern China Plain Lakes

**Figure S3** Relative abundance of nitrogen removal functional genes in sediments of the Eastern China Plain Lakes

**Figure S4** Similarity matrix of nitrogen removal functional genes in sediments of the Eastern China Plain Lakes and hierarchical clustering of sampling sites

**Figure S5** Relative abundance cluster analysis of the Top 20 phylum microbial in sediments of the Eastern China Plain Lakes

**Figure S6** Similarity matrix of microbial communities in sediments of the Eastern China Plain Lakes and hierarchical clustering of sampling sites

**Figure S7** Network of interactions linking nitrogen removal rates with environmental factors, functional genes, and microbial communities, revealed by Spearman's correlations and Mantel tests

**Figure S8** Sediment parameters of the Eastern China Plain Lakes

37 **Supplementary Table**

38 **Table S1** Location of lakes and number of sampling sites

39 **Table S2** Environmental physicochemical parameters and determination methods

40 **Table S3** Climate data for the Eastern China Plain lakes

41 **Table S4** Conversion index (*CI*) of construction land equivalent of different land use  
42 types

43 **Table S5** Nitrogen removal rates in sediments of the Eastern China Plain Lakes

44 **Table S6** Abundance of nitrogen removal functional genes in sediments of the Eastern  
45 China Plain Lakes

46 **Table S7** Physical parameters of water and sediments in Eastern China Plain lakes

47

## Supplementary Methods

### Method S1 Overview of the Eastern China Plain lakes region

The Eastern China Plain lakes region administratively encompasses 19 provincial-level divisions across eastern, central, and southern China, including Jiangxi, Hunan, Hubei, Anhui, Henan, Jiangsu, Shanghai, Shandong, Hebei, Beijing, Tianjin, Zhejiang, Taiwan, Hong Kong, Macau, Hainan, Fujian, Guangdong, and Guangxi. This region hosts 634 lakes with surface areas exceeding 1 km<sup>2</sup> and notably contains China's five largest freshwater lakes: Poyang, Dongting, Taihu, Hongze, and Chaohu. Limnologically, the lakes in this region are predominantly shallow, with mean depths typically ranging from 1 to 6 m (Ma et al., 2010). The 17 representative lakes selected for this study are primarily distributed across two strategic zones. (1) The Middle and Lower Reaches of the Yangtze River (MLRYR): Comprising 10 lakes, namely Lakes Poyang, Dongting, Taihu, Chaohu, Donghu, Nanyi, and Gucheng, as well as the Fangbian, Zhongshan, and Yaojia Reservoirs. (2) Along the Eastern Route of the South-to-North Water Diversion Project (ER-SNWD): Comprising 7 lakes, namely Lakes Shaobo, Gaoyou, Hongze, Luoma, Nansi, Dongping, and Hengshui.

The study area exhibits distinct climatic gradients. The MLRYR region is characterized by a typical subtropical monsoon climate. The mean annual temperature (MAT) ranges from 14 to 18°C, with the coldest monthly means around 0°C and the warmest between 27 and 28°C. The annual frost-free period lasts 210–270 days. Mean annual precipitation (MAP) exhibits an increasing spatial gradient from the lower reaches (~1,000 mm) to the middle reaches (~1,500 mm) (Guo et al., 2022). While the southern portion of the ER-SNWD region shares similar climatic conditions with the MLRYR, the northernmost lakes—specifically Hengshui, Dongping, and Nansi—are influenced by a temperate monsoon climate, characterized by relatively lower temperatures and precipitation. Specifically, the Hengshui Lake basin records a MAP of 518.9 mm and a MAT of 13.0°C (Zhang et al., 2024). Similarly, the Dongping and Nansi Lake basins exhibit MAP values of 624.4 mm and 685 mm, with MAT values of 13.6°C and 14.2°C, respectively (Wei et al., 2024).

## Method S2 Calculation formula for the Comprehensive Trophic Level

### Index (TLI)

The TLI is calculated as follows (Wang et al., 2019):

$$TLI(\Sigma) = \sum_{j=1}^m W_j \cdot TLI(j) \quad (1)$$

$$TLI(Chl.a) = 10(2.5 + 1.086 \ln Chl.a) \quad (2)$$

$$TLI(TP) = 10(9.436 + 1.624 \ln TP) \quad (3)$$

$$TLI(TN) = 10(5.453 + 1.694 \ln TN) \quad (4)$$

$$TLI(SD) = 10(5.118 - 1.94 \ln SD) \quad (5)$$

$$TLI(COD_{Mn}) = 10(0.109 + 2.661 \ln COD_{Mn}) \quad (6)$$

where  $TLI(\Sigma)$  represents the aggregated comprehensive trophic level index;  $TLI(j)$  denotes the individual trophic index of the  $j$ -th parameter; and  $W_j$  is the weighting factor for the  $j$ -th parameter. Specifically, the weights assigned to  $Chl.a$ , TP, TN, SD, and  $COD_{Mn}$  were 0.2663, 0.1879, 0.1790, 0.1834, and 0.1834, respectively (units:  $\mu g/L$ ,  $mg/L$ ,  $mg/L$ ,  $m$ , and  $mg/L$ ).

Based on the calculated TLI scores, the trophic status was classified into five categories: oligotrophic ( $0 < TLI < 30$ ), mesotrophic ( $30 < TLI < 50$ ), light eutrophic ( $50 < TLI < 60$ ), moderate eutrophic ( $60 < TLI < 70$ ), and hyper-eutrophic ( $70 < TLI < 100$ ).

## Method S3 Land use data sources, preprocessing, and calculations for the Human Activity Intensity (HAI)

Landsat remote sensing images (cloud cover  $< 10\%$ ) from October to November 2024 were acquired from the Geospatial Data Cloud (<http://www.gscloud.cn/>) covering all study lakes and surrounding areas. Following preprocessing steps including radiometric calibration, geometric correction, and cropping, land use was classified into six categories based on the Chinese Academy of Sciences classification system: cultivated land, forest, grassland, water, construction land, and unused land. Interpretation was performed using the Support Vector Machine (SVM) supervised classification method. Post-classification verification confirmed an overall accuracy exceeding 92% (Zhu et al., 2015). Land use data were subsequently extracted for 2 km and 5 km buffer zones

surrounding each lake to quantify human activity intensity.

The HAI is calculated as follows:

$$HAI = \frac{S_{CLE}}{S} \times 100\% \quad (7)$$

$$S_{CLE} = \sum_{i=1}^n (SL_i \cdot CI_i) \quad (8)$$

where HAI represents the human activity intensity;  $S_{CLE}$  is the total area of construction land equivalents;  $S$  is the total area of the region;  $SL_i$  is the area of the  $i$ -th land use type;  $CI_i$  is the construction land equivalent conversion coefficient for the  $i$ -th land use type (Tab. S4); and  $n$  is the number of land use types in the region.

## **Method S4 Detailed protocol for isotope slurry incubations, calculation principles, and formulas**

### **1. Slurry preparation and pre-incubation**

Sediment slurries were prepared by mixing homogenized sediment with site water at a mass ratio of 1:7 in 500 mL serum bottles. To eliminate background dissolved oxygen (DO), the slurries were purged with high-purity helium (He) for 30 min. Following purging, the bottles were sealed, wrapped in aluminum foil to maintain darkness, and pre-incubated for 48 h in a constant-temperature water bath set to the in situ temperature. This step was performed to deplete residual background  $^{14}\text{NO}_3\text{-N}$  and DO.

### **2. $^{15}\text{N}$ tracer addition**

After pre-incubation, the slurries were vigorously shaken, and a 10 mL aliquot was filtered to determine the background  $\text{NO}_3\text{-N}$  concentration. Subsequently, a  $\text{Na}^{15}\text{NO}_3$  solution (concentration: 0.4 mg/L) was added to the serum bottles. The slurries were mixed thoroughly, and another 10 mL aliquot was filtered. The actual  $^{15}\text{N}$  enrichment in the slurry was calculated based on the difference in  $\text{NO}_3\text{-N}$  concentrations between the two filtrations.

### **3. Incubation procedure**

Following isotope addition, the headspace was purged with high-purity He for 5 min to ensure anaerobic conditions. Under continuous He flow, the slurries were transferred via a peristaltic pump into 12 mL gas-tight glass vials (Labco Exetainer, UK), ensuring

no headspace remained. Microbial activity in the initial samples (0 h) was immediately terminated by injecting 0.2 mL of saturated ZnCl<sub>2</sub> solution (50% w/v). The remaining vials were wrapped in aluminum foil and incubated in the dark at *in situ* temperature for 4 h. At the end of the incubation, ZnCl<sub>2</sub> was added to terminate the reaction. All treatments were performed in triplicate.

#### 4. Calculation Principles and formulas

The two N atoms required for anammox to produce N<sub>2</sub> are supplied by NO<sub>3</sub>-N and NH<sub>3</sub>-N, respectively. Since NH<sub>3</sub>-N was not isotopically labeled in this experiment, anammox utilized only <sup>14</sup>NO<sub>3</sub>-N and <sup>15</sup>NO<sub>3</sub>-N to generate <sup>28</sup>N<sub>2</sub> and <sup>29</sup>N<sub>2</sub>, respectively. Conversely, denitrification produces <sup>28</sup>N<sub>2</sub>, <sup>29</sup>N<sub>2</sub>, and <sup>30</sup>N<sub>2</sub> through the addition of Na<sup>15</sup>NO<sub>3</sub>. The rates were calculated as follows:

$$V_{\text{den}} = (C_{30}^* - C_{30}) \times \frac{k}{4} / F_n^2 \times 1000 \quad (9)$$

$$V_{\text{ana}} = [(C_{29}^* - C_{29}) + 2 \times (1 - 1/F_n) \times (C_{30}^* - C_{30})] \times \frac{k}{4} / F_n \times 1000 \quad (10)$$

Where:  $V_{\text{den}}$  and  $V_{\text{ana}}$  are the rates of denitrification and anammox (nmol·g<sup>-1</sup>·h<sup>-1</sup>), respectively;  $C_{30}^*$  and  $C_{30}$  are the concentrations of <sup>30</sup>N<sub>2</sub> (μmol/L) at 4 h and 0 h, respectively (analogous for  $C_{29}^*$  and  $C_{29}$ );  $k$  represents the ratio of slurry volume to sediment mass in the vial; and  $F_n$  is the <sup>15</sup>N labeling fraction of the nitrate pool.

Total nitrogen removal rate was defined as the sum of  $V_{\text{den}}$  and  $V_{\text{ana}}$ . The relative contribution of anammox ( $Ra$ ) was calculated as:

$$Ra = V_{\text{ana}} / (V_{\text{den}} + V_{\text{ana}}) \quad (11)$$

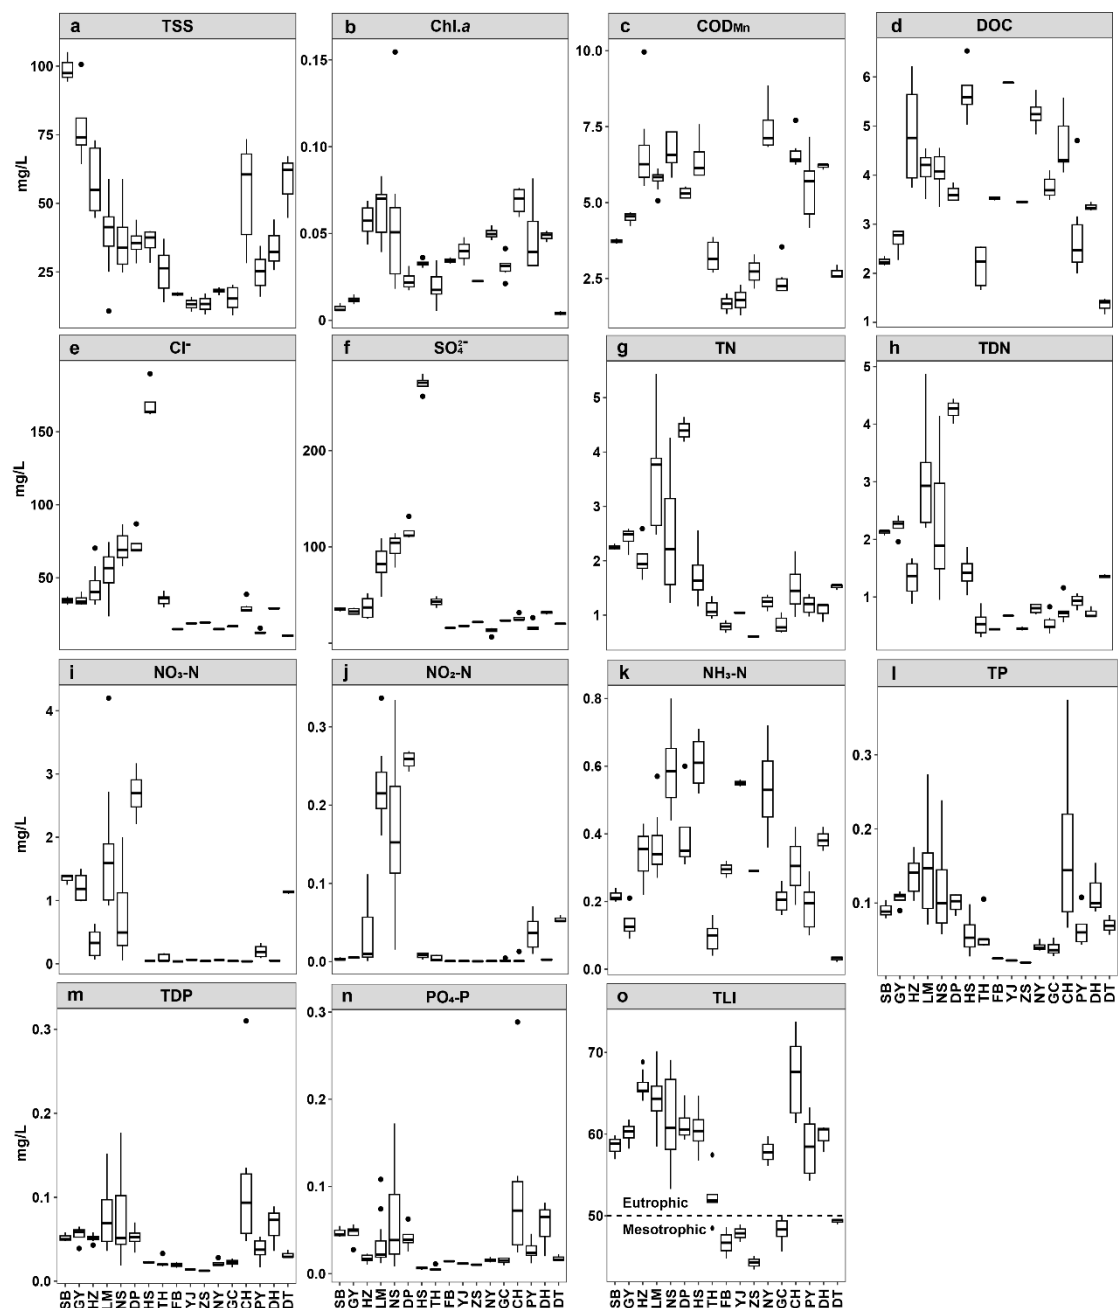

**Figure S1 Water quality parameters of the Eastern China Plain Lakes**

Note: Total suspended solids (TSS), chlorophyll a (Chl.a), permanganate index (COD<sub>Mn</sub>), dissolved organic carbon (DOC), chloride ion (Cl<sup>-</sup>), sulfate ion (SO<sub>4</sub><sup>2-</sup>), total nitrogen (TN), total dissolved nitrogen (TDN), nitrate nitrogen (NO<sub>3</sub>-N), nitrite nitrogen (NO<sub>2</sub>-N), ammonia nitrogen (NH<sub>3</sub>-N), total phosphorus (TP), total dissolved phosphorus (TDP), orthophosphate (PO<sub>4</sub>-P), and Comprehensive Trophic Level Index (TLi).



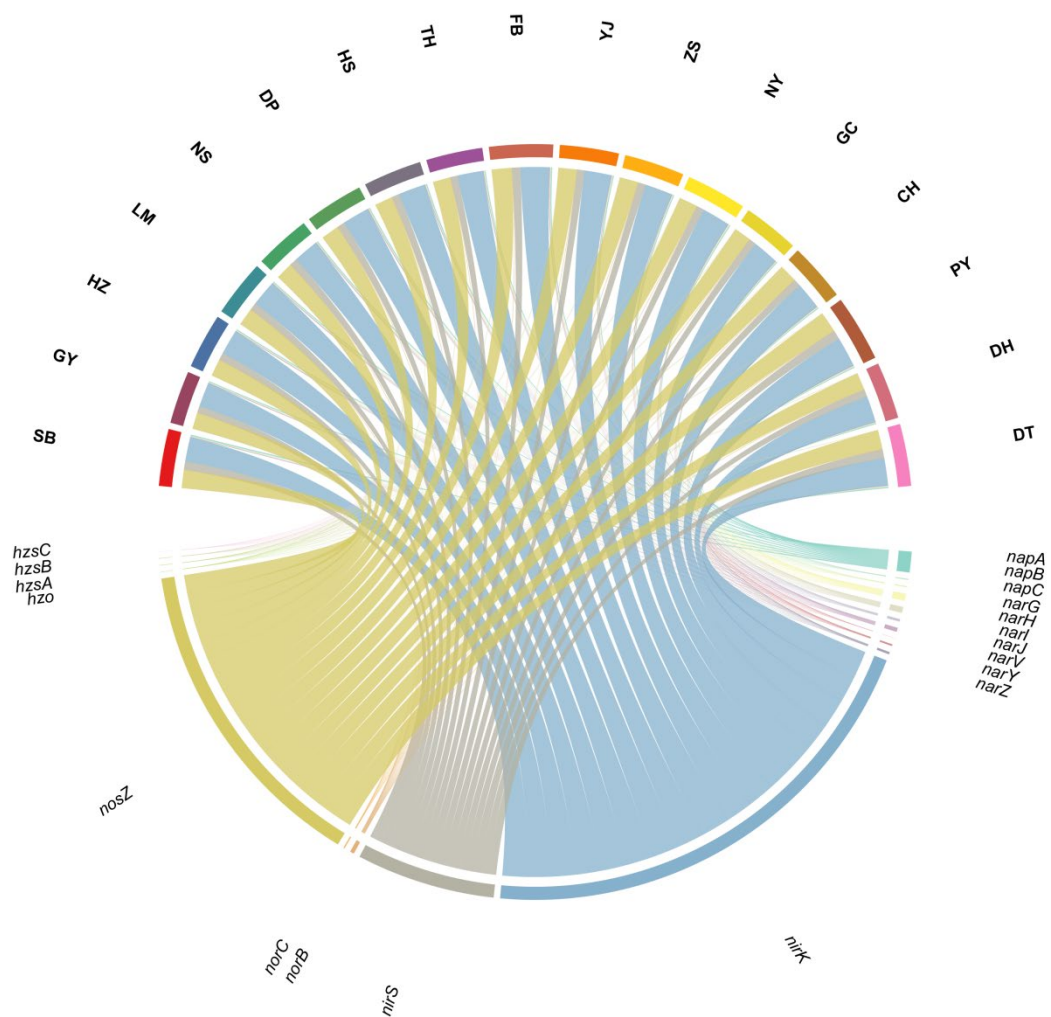

**Figure S2 Relative abundance of nitrogen removal functional genes in sediments of the Eastern China Plain Lakes**

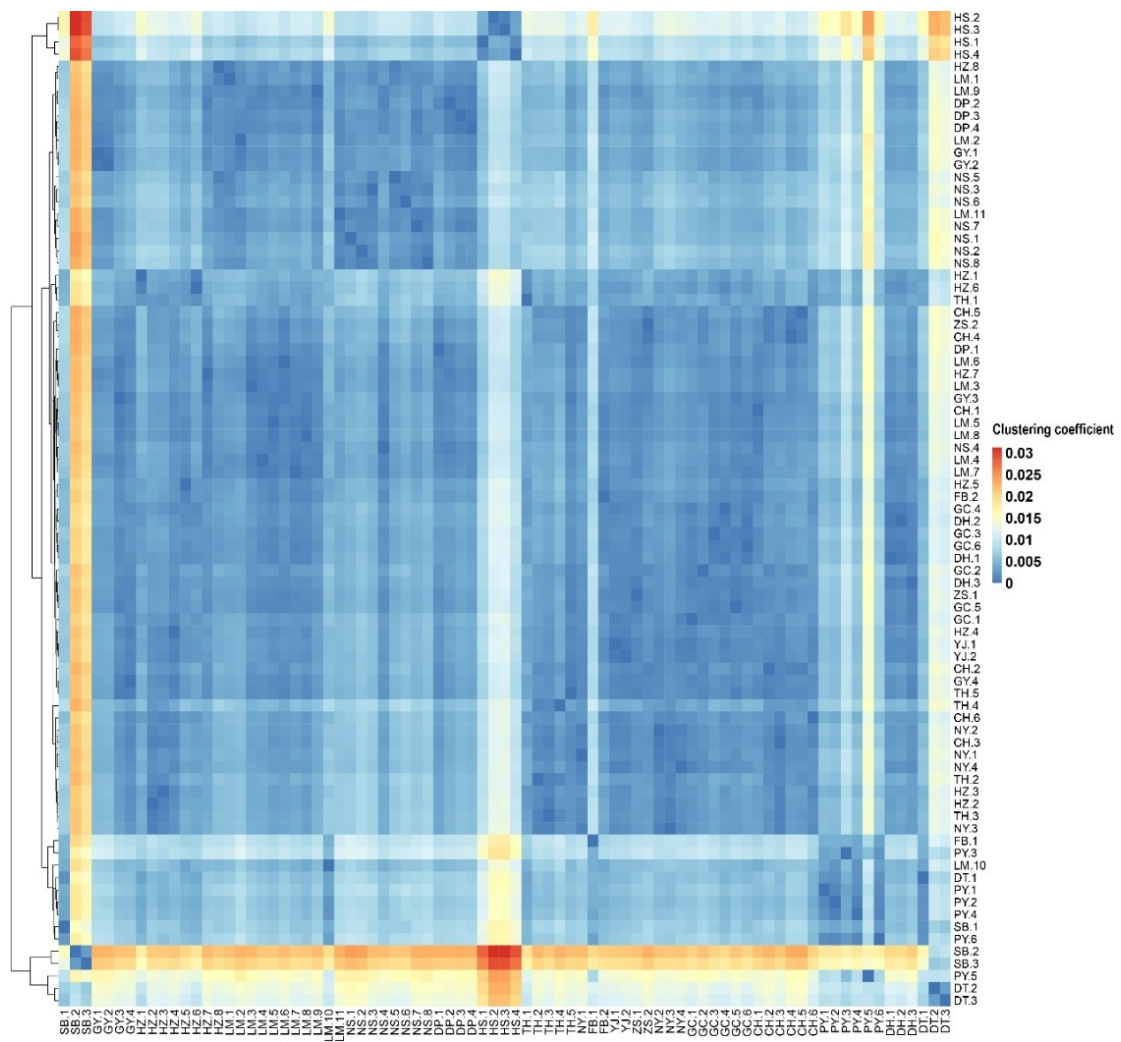

**Figure S3 Similarity matrix of nitrogen removal functional genes in sediments of the Eastern China Plain Lakes and hierarchical clustering of sampling sites**

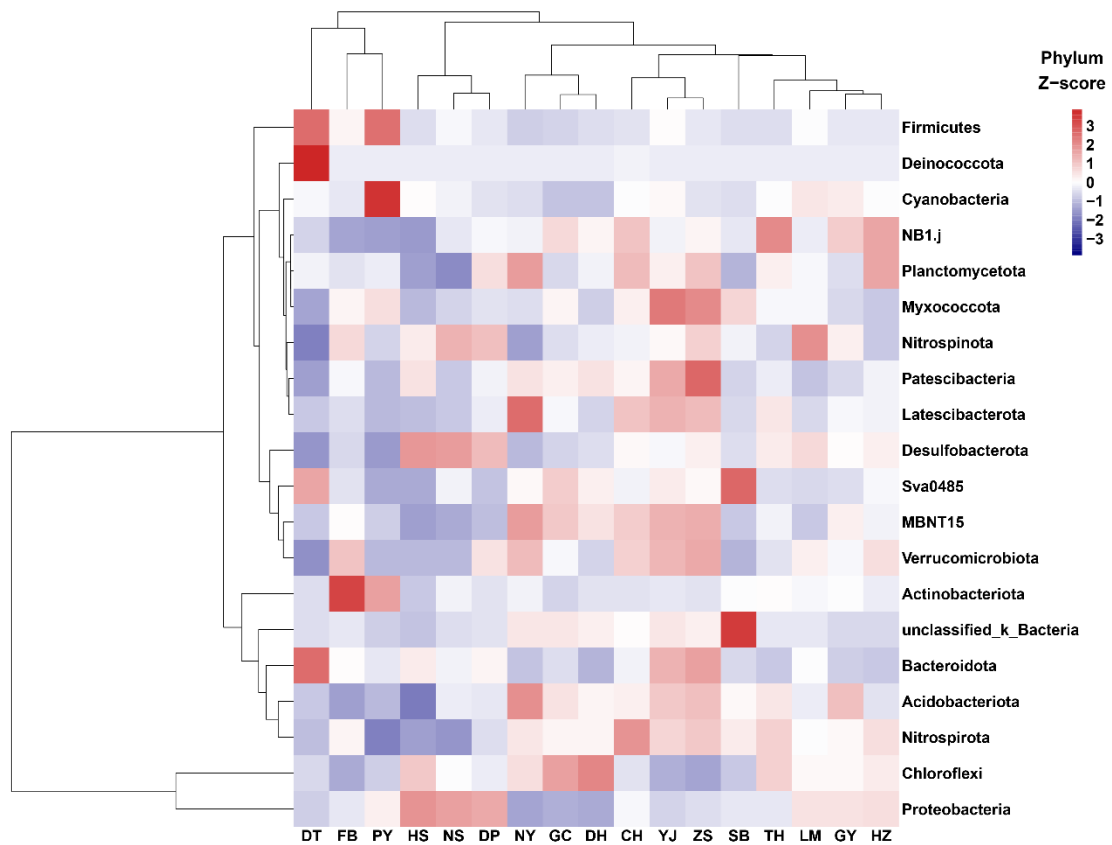

**Figure S4 Relative abundance cluster analysis of the Top 20 phylum microbial in sediments of the Eastern China Plain Lakes**

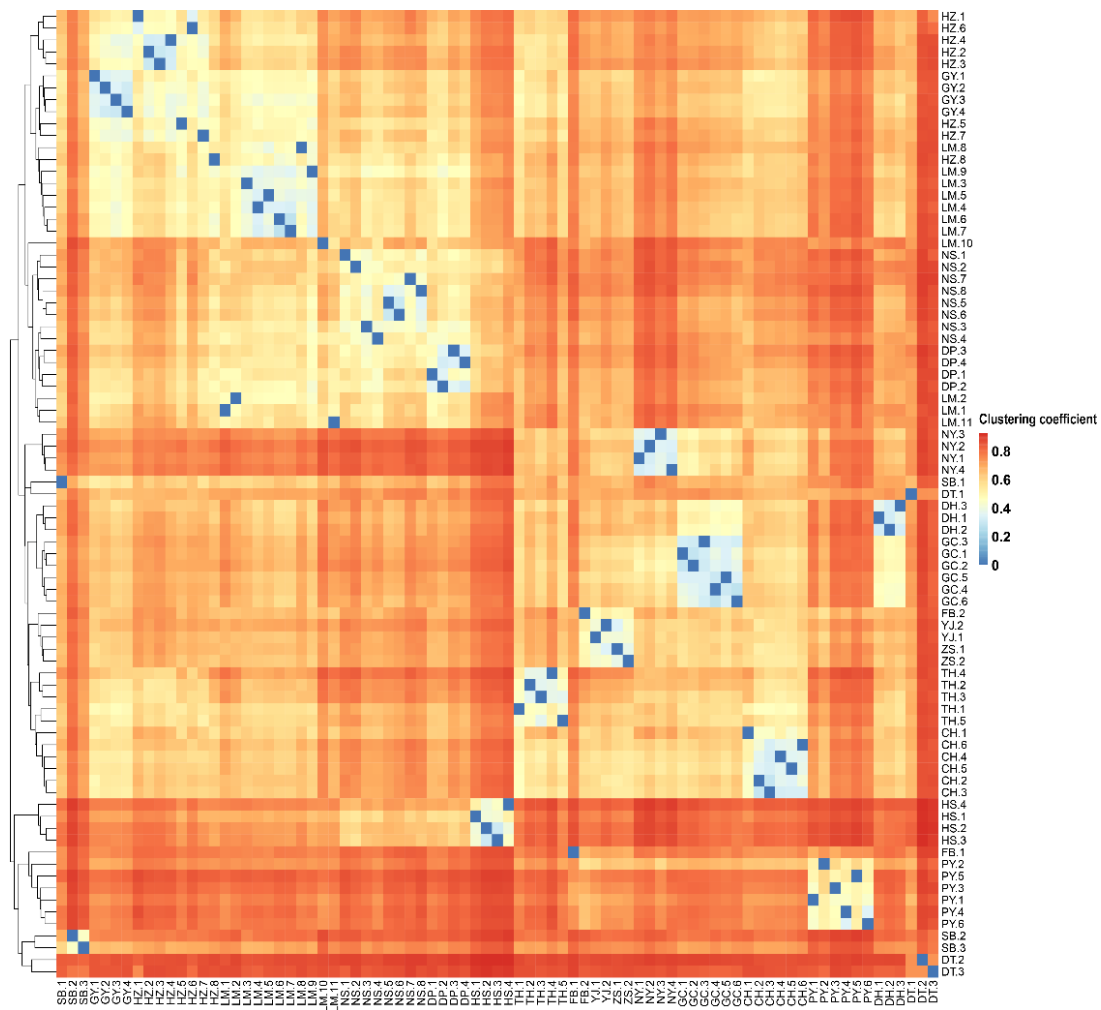

**Figure S5 Similarity matrix of microbial communities in sediments of the Eastern China Plain Lakes and hierarchical clustering of sampling sites**

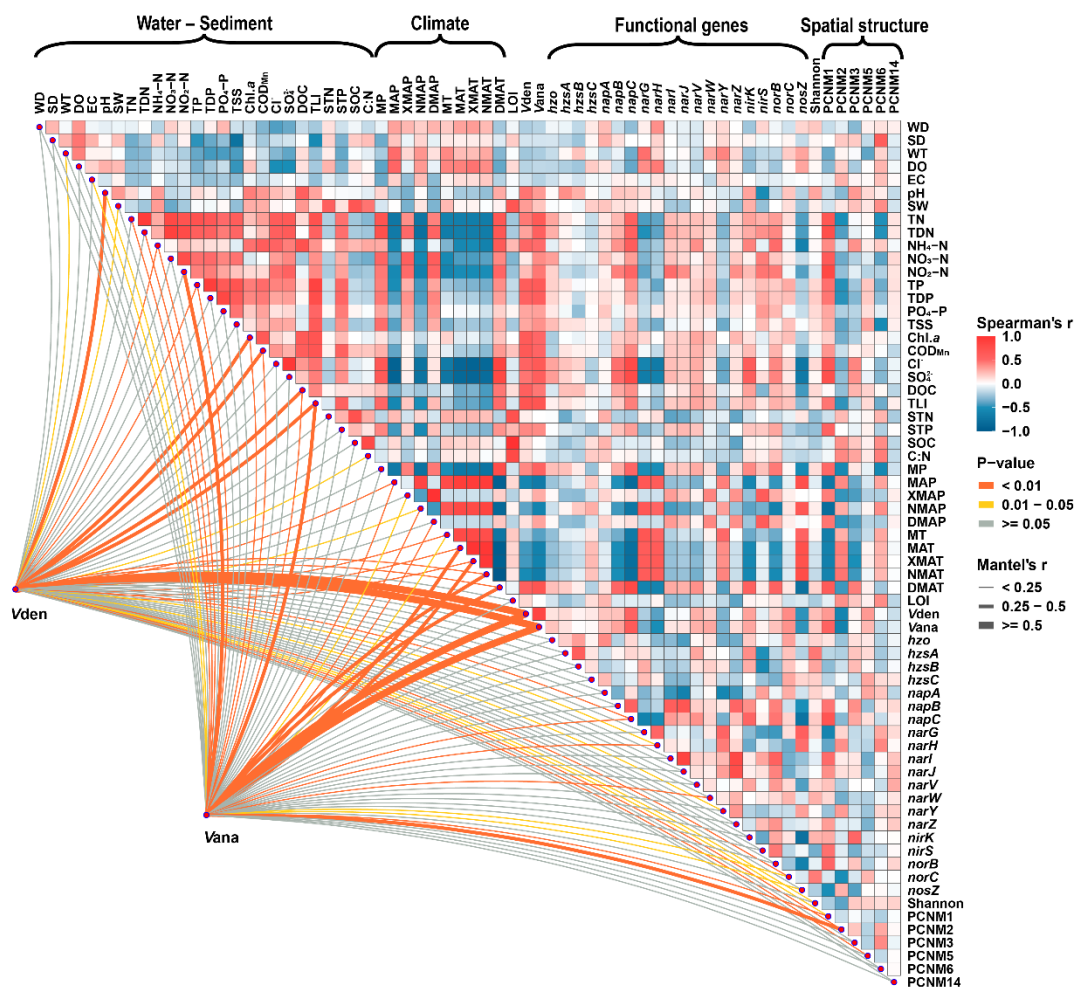

**Figure S6 Network of interactions linking nitrogen removal rates with environmental factors, functional genes, and microbial communities, revealed by Spearman's correlations and Mantel tests**

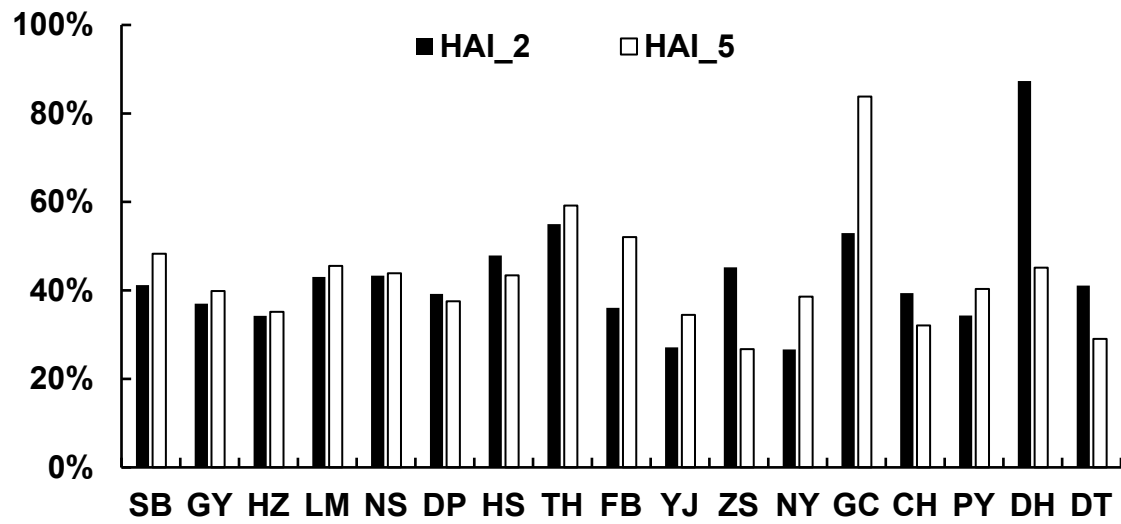

**Figure S7 Human activity intensity within 2-km and 5-km buffer zones surrounding the Eastern China Plain Lakes**

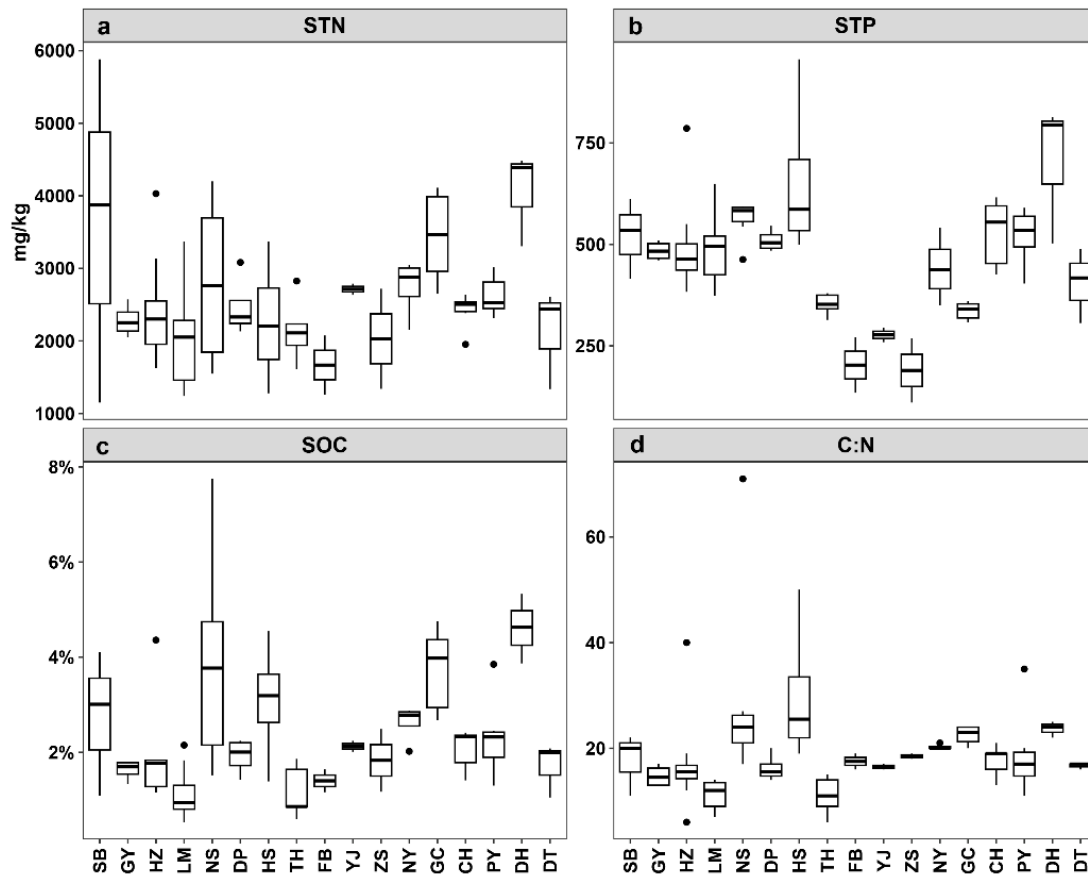

**Figure S8 Sediment parameters of the Eastern China Plain Lakes**

Note: Total nitrogen in sediments in sediments (STN), total phosphorus in sediments (STP), total organic carbon in sediments (SOC), and calculating the C:N ratio of sediments based on the ratio of STN to SOC.

## Supplementary Tables

**Table S1 Location of lakes and number of sampling sites**

| No. | Lake name           | Name abbreviation | Longitude/° | Latitude/° | Area /km <sup>2</sup> | Mean water depth /m | Number of sampling sites |
|-----|---------------------|-------------------|-------------|------------|-----------------------|---------------------|--------------------------|
| 1   | Lake Shaobo         | SB                | 119.493333  | 32.523056  | 63.15                 | 1.87                | 3                        |
| 2   | Lake Gaoyou         | GY                | 119.193334  | 32.753485  | 760.67                | 1.51                | 4                        |
| 3   | Lake Hongze         | HZ                | 118.814649  | 33.320416  | 1775                  | 1.77                | 7                        |
| 4   | Lake Luoma          | LM                | 118.113251  | 34.133221  | 290                   | 3.32                | 11                       |
| 5   | Lake Nansi          | NS                | 116.623005  | 35.257664  | 1266                  | 2.60                | 8                        |
| 6   | Lake Dongping       | DP                | 116.230180  | 35.936334  | 124                   | 2.50                | 4                        |
| 7   | Lake Hengshui       | HS                | 115.628872  | 37.639519  | 75                    | 1.70                | 4                        |
| 8   | Lake Taihu          | TH                | 120.192694  | 31.409092  | 2338.1                | 1.89                | 5                        |
| 9   | Fangbian reservoir  | FB                | 119.131537  | 31.688846  | 4.87                  | 3.60                | 2                        |
| 10  | Yaojia reservoir    | YJ                | 119.104672  | 31.562082  | 1.69                  | 6.30                | 2                        |
| 11  | Zhongshan reservoir | ZS                | 119.069223  | 31.640595  | 3.24                  | 5.50                | 2                        |
| 12  | Lake Nanyi          | NY                | 118.889108  | 31.108874  | 200                   | 2.2                 | 4                        |
| 13  | Lake Gucheng        | GC                | 118.889237  | 31.308475  | 36.97                 | 4.2                 | 6                        |
| 14  | Lake Chaohu         | CH                | 117.362960  | 31.682970  | 780                   | 3                   | 6                        |
| 15  | Lake Poyang         | PY                | 116.140549  | 29.578348  | 3950                  | 8.4                 | 6                        |
| 16  | Lake Donghu         | DH                | 114.369986  | 30.548226  | 33                    | 2.5                 | 3                        |
| 17  | Lake Dongting       | DT                | 113.009083  | 29.342002  | 2625                  | 6.74                | 3                        |

Note: The longitude and latitude listed in the table represent only a specific site for each lake (including reservoir).



**Table S2 Environmental physicochemical parameters and determination methods**

| Parameter                                    | Unit  | Measurement method                                                        |
|----------------------------------------------|-------|---------------------------------------------------------------------------|
| Water Depth (WD)                             | cm    | Speedtech SM-5 depth sounder                                              |
| Secchi depth (SD)                            | cm    | Secchi disk                                                               |
| Water temperature (WT)                       | °C    | portable multi-parameter water quality meter (YSI Professional Plus, USA) |
| Dissolved oxygen (DO)                        | mg/L  |                                                                           |
| Electrical conductivity (EC)                 | μS/cm |                                                                           |
| pH                                           | /     |                                                                           |
| Total nitrogen (TN)                          | mg/L  | Alkaline Potassium Persulfate Digestion—UV Spectrophotometry              |
| Total dissolved nitrogen (TDN)               | mg/L  |                                                                           |
| Ammonia nitrogen (NH <sub>3</sub> -N)        | mg/L  | Nessler's Reagent—UV Spectrophotometry                                    |
| Nitrate nitrogen (NO <sub>3</sub> -N)        | mg/L  | UV Spectrophotometry                                                      |
| Nitrite nitrogen (NO <sub>2</sub> -N)        | mg/L  |                                                                           |
| Total phosphorus (TP)                        | mg/L  | Potassium Persulfate Digestion Ammonium Molybdate—UV Spectrophotometry    |
| Total dissolved phosphorus (TDP)             | mg/L  |                                                                           |
| Orthophosphate (PO <sub>4</sub> -P)          | mg/L  | Ammonium Molybdate—UV Spectrophotometry                                   |
| Total suspended solids (TSS)                 | mg/L  | Filter Membrane Drying and Weighing Method                                |
| Permanganate index (COD <sub>Mn</sub> )      | mg/L  | Potassium Permanganate Titration                                          |
| Chloride ion (Cl <sup>-</sup> )              | mg/L  | Silver Nitrate Titration                                                  |
| Sulfate ion (SO <sub>4</sub> <sup>2-</sup> ) | mg/L  | Barium Chromate—UV Spectrophotometry                                      |
| Chlorophyll a (Chl. <i>a</i> )               | ug/L  | Alcohol (95%) Extraction—UV Spectrophotometry                             |
| Dissolved organic carbon (DOC)               | mg/L  | Tekmar Torch Total Organic Carbon Analyzer                                |
| Water content in sediments (SW, %)           | /     | Weight Method                                                             |
| Total nitrogen in sediments (STN)            | mg/kg | Alkaline Potassium Persulfate Digestion—UV Spectrophotometry              |
| Total phosphorus in sediments (STP)          | mg/kg | Potassium Persulfate Digestion Ammonium Molybdate—UV Spectrophotometry    |
| Total organic carbon in sediments (SOC, %)   | /     | Euro Vector EA3000 Fully Automated Elemental Analyzer                     |

Note: All colorimetric assays were performed using a UV-visible spectrophotometer (UV-1102 II, Techcomp, China).

**Table S3 Climate data for the Eastern China Plain lakes**

| <b>Lake</b> | <b>MP</b><br><b>/mm</b> | <b>MAP</b><br><b>/mm</b> | <b>XMAP</b><br><b>/mm</b> | <b>NMAP</b><br><b>/mm</b> | <b>DMAP</b><br><b>/mm</b> | <b>MT</b><br><b>/°C</b> | <b>MAT</b><br><b>/°C</b> | <b>XMAT</b><br><b>/°C</b> | <b>NMAT</b><br><b>/°C</b> | <b>DMAT</b><br><b>/°C</b> |
|-------------|-------------------------|--------------------------|---------------------------|---------------------------|---------------------------|-------------------------|--------------------------|---------------------------|---------------------------|---------------------------|
| SB          | 338.9                   | 99.7                     | 453.5                     | 2.5                       | 451                       | 30                      | 16.8                     | 29.4                      | 3.6                       | 25.8                      |
| GY          | 338.9                   | 99.7                     | 453.5                     | 2.5                       | 451                       | 30                      | 16.8                     | 29.4                      | 3.6                       | 25.8                      |
| HZ          | 162                     | 93.2                     | 444.6                     | 2.9                       | 441.6                     | 29.8                    | 16.6                     | 29.2                      | 3.1                       | 26.2                      |
| LM          | 191.4                   | 89.1                     | 450.3                     | 1.9                       | 448.4                     | 29.8                    | 16.3                     | 29                        | 2                         | 27                        |
| NS          | 189.7                   | 77.6                     | 442.7                     | 0.8                       | 441.9                     | 29.3                    | 16.1                     | 28.9                      | 1.3                       | 27.6                      |
| DP          | 185.8                   | 64.3                     | 364.3                     | 0.4                       | 363.8                     | 28.9                    | 15.9                     | 28.5                      | 0.8                       | 27.8                      |
| HS          | 202.5                   | 50.3                     | 248.5                     | 0.5                       | 248                       | 28.4                    | 15.3                     | 28.4                      | -0.6                      | 29                        |
| TH          | 108                     | 106.6                    | 301.1                     | 10.2                      | 290.9                     | 30.2                    | 17.4                     | 29.7                      | 5                         | 24.7                      |
| FB          | 118.4                   | 108.1                    | 372.9                     | 5.2                       | 367.7                     | 30.4                    | 17.3                     | 29.8                      | 4.5                       | 25.3                      |
| YJ          | 118.4                   | 108.1                    | 372.9                     | 5.2                       | 367.7                     | 30.4                    | 17.3                     | 29.8                      | 4.5                       | 25.3                      |
| ZS          | 118.4                   | 108.1                    | 372.9                     | 5.2                       | 367.7                     | 30.4                    | 17.3                     | 29.8                      | 4.5                       | 25.3                      |
| NY          | 134.3                   | 115.2                    | 331.9                     | 8.1                       | 323.8                     | 30.7                    | 17.7                     | 30                        | 4.9                       | 25.1                      |
| GC          | 134.3                   | 115.2                    | 331.9                     | 8.1                       | 323.8                     | 30.7                    | 17.7                     | 30                        | 4.9                       | 25.1                      |
| CH          | 160.9                   | 99.5                     | 318.1                     | 5.4                       | 312.6                     | 30.8                    | 17.7                     | 30                        | 4.7                       | 25.4                      |
| PY          | 133.6                   | 150.6                    | 467                       | 4                         | 463                       | 31.8                    | 19.3                     | 31.1                      | 6.9                       | 24.2                      |
| DH          | 31.5                    | 104                      | 316.2                     | 4.4                       | 311.8                     | 31.1                    | 18.3                     | 30.5                      | 5.5                       | 25                        |
| DT          | 54.3                    | 113.1                    | 386.4                     | 6.1                       | 380.3                     | 26.3                    | 18.8                     | 30.6                      | 6.5                       | 24.1                      |

Note: The monthly mean precipitation (MP) and mean temperature (MT) were extracted for the sampling months, mean annual precipitation (MAP), maximum (XMAP) and minimum (NMAP) monthly precipitation, difference between XMAP and NMAP (DMAP), mean annual temperature (MAT), maximum (XMAT) and minimum (NMAT) monthly temperatures, and difference between XMAT and NMAT (DMAT).

**Table S4 Conversion index (*CI*) of construction land equivalent of different land use types**

| Land use type     | Characteristic indicator description                                                    | <i>CI</i> |
|-------------------|-----------------------------------------------------------------------------------------|-----------|
| cultivated land   | Surface natural vegetation altered—cultivated with annual crops                         | 0.2       |
| forest            | Surface natural vegetation altered—cultivated with perennial plants                     | 0.133     |
| grassland         | Surface natural vegetation unchanged but utilized                                       | 0.067     |
| water             | Surface natural vegetation unchanged and unused                                         | 0         |
| construction land | Surface layer with artificial barrier, impeding water, nutrient, air, and heat exchange | 1         |
| unused land       | Surface natural cover unchanged and unused                                              | 0         |

**Table S5 Nitrogen removal rates in sediments of the Eastern China Plain Lakes**

| Lake | $V_{\text{den}}$ (mean $\pm$ SE) | $V_{\text{ana}}$ (mean $\pm$ SE) | $Ra/\%$ (mean $\pm$ SE) |
|------|----------------------------------|----------------------------------|-------------------------|
| SB   | 66.98 $\pm$ 7.49                 | 14.93 $\pm$ 1.74                 | 22.33 $\pm$ 1.94        |
| GY   | 64.55 $\pm$ 5.20                 | 14.48 $\pm$ 2.56                 | 22.34 $\pm$ 2.85        |
| HZ   | 117.54 $\pm$ 17.95               | 31.54 $\pm$ 8.67                 | 26.73 $\pm$ 6.43        |
| LM   | 101.18 $\pm$ 10.28               | 30.27 $\pm$ 6.19                 | 29.96 $\pm$ 5.46        |
| NS   | 111.97 $\pm$ 15.69               | 28.47 $\pm$ 5.14                 | 25.46 $\pm$ 3.48        |
| DP   | 71.61 $\pm$ 8.77                 | 24.67 $\pm$ 4.69                 | 34.34 $\pm$ 4.38        |
| HS   | 78.39 $\pm$ 12.22                | 13.56 $\pm$ 4.45                 | 17.03 $\pm$ 3.98        |
| TH   | 47.42 $\pm$ 12.48                | 6.01 $\pm$ 3.06                  | 12.64 $\pm$ 5.00        |
| FB   | 46.96 $\pm$ 2.89                 | 4.16 $\pm$ 1.93                  | 9.00 $\pm$ 4.66         |
| YJ   | 57.76 $\pm$ 1.43                 | 11.63 $\pm$ 0.53                 | 20.15 $\pm$ 1.42        |
| ZS   | 57.42 $\pm$ 10.72                | 4.55 $\pm$ 3.07                  | 8.58 $\pm$ 6.95         |
| GC   | 75.06 $\pm$ 7.55                 | 11.25 $\pm$ 4.02                 | 15.19 $\pm$ 5.67        |
| NY   | 76.19 $\pm$ 5.33                 | 13.67 $\pm$ 1.45                 | 18.00 $\pm$ 2.29        |
| CH   | 112.23 $\pm$ 27.78               | 19.67 $\pm$ 8.26                 | 17.64 $\pm$ 5.19        |
| PY   | 40.64 $\pm$ 12.98                | 6.75 $\pm$ 2.97                  | 16.37 $\pm$ 4.13        |
| DH   | 93.52 $\pm$ 9.49                 | 17.73 $\pm$ 1.58                 | 18.99 $\pm$ 0.87        |
| DT   | 26.58 $\pm$ 4.84                 | 2.50 $\pm$ 0.90                  | 9.28 $\pm$ 2.65         |

Note: The units for  $V_{\text{den}}$  and  $V_{\text{ana}}$  are  $\text{nmol N} \cdot \text{g}^{-1} \cdot \text{h}^{-1}$ .

**Table S6 Abundance of nitrogen removal functional genes in sediments of the Eastern China Plain Lakes (mean  $\pm$  SE)**

| Metabolic processes         | Genes       | SB                       | GY                      | HZ                      | LM                      | NS                      | DP                      |
|-----------------------------|-------------|--------------------------|-------------------------|-------------------------|-------------------------|-------------------------|-------------------------|
| Denitrification             | <i>napA</i> | 55167.00 $\pm$ 3600.77   | 49618.75 $\pm$ 545.53   | 50148.88 $\pm$ 1195.57  | 50017.91 $\pm$ 718.43   | 50706.25 $\pm$ 518.52   | 49703.00 $\pm$ 334.55   |
| Denitrification             | <i>napB</i> | 1044.67 $\pm$ 230.05     | 1396.50 $\pm$ 58.95     | 1392.25 $\pm$ 72.08     | 1475.64 $\pm$ 98.04     | 1540.50 $\pm$ 63.44     | 1596.00 $\pm$ 39.43     |
| Denitrification             | <i>napC</i> | 1765.00 $\pm$ 394.09     | 2111.50 $\pm$ 164.84    | 2188.25 $\pm$ 157.02    | 2305.73 $\pm$ 89.89     | 2494.25 $\pm$ 166.11    | 2355.00 $\pm$ 76.58     |
| Denitrification             | <i>narG</i> | 12122.00 $\pm$ 560.88    | 13149.25 $\pm$ 103.51   | 13349.12 $\pm$ 554.38   | 12579.73 $\pm$ 203.88   | 12397.50 $\pm$ 969.47   | 12381.75 $\pm$ 295.33   |
| Denitrification             | <i>narH</i> | 11144.00 $\pm$ 166.35    | 10839.50 $\pm$ 99.76    | 10858.00 $\pm$ 151.68   | 11026.82 $\pm$ 384.94   | 10982.25 $\pm$ 200.12   | 11103.00 $\pm$ 100.91   |
| Denitrification             | <i>narI</i> | 4371.00 $\pm$ 658.00     | 4798.25 $\pm$ 176.07    | 4849.25 $\pm$ 216.91    | 5026.82 $\pm$ 233.45    | 5217.38 $\pm$ 183.10    | 5261.75 $\pm$ 116.08    |
| Denitrification             | <i>narJ</i> | 6600.00 $\pm$ 1347.16    | 7974.75 $\pm$ 311.86    | 8020.50 $\pm$ 299.18    | 8246.73 $\pm$ 341.51    | 8356.25 $\pm$ 283.25    | 8756.75 $\pm$ 172.97    |
| Denitrification             | <i>narV</i> | 71.67 $\pm$ 12.58        | 92.00 $\pm$ 7.79        | 86.62 $\pm$ 10.53       | 98.91 $\pm$ 13.98       | 96.25 $\pm$ 23.01       | 77.25 $\pm$ 5.25        |
| Denitrification             | <i>narW</i> | 11.00 $\pm$ 7.55         | 17.00 $\pm$ 3.65        | 20.50 $\pm$ 7.75        | 19.45 $\pm$ 7.35        | 19.75 $\pm$ 12.62       | 13.50 $\pm$ 7.14        |
| Denitrification             | <i>narY</i> | 2885.00 $\pm$ 386.24     | 3394.25 $\pm$ 67.49     | 3344.75 $\pm$ 62.41     | 3382.18 $\pm$ 113.39    | 3244.00 $\pm$ 113.06    | 3461.75 $\pm$ 110.69    |
| Denitrification             | <i>narZ</i> | 4922.67 $\pm$ 730.60     | 5368.25 $\pm$ 171.86    | 5502.25 $\pm$ 307.95    | 5738.27 $\pm$ 235.84    | 5650.00 $\pm$ 189.25    | 5805.00 $\pm$ 79.98     |
| Denitrification             | <i>norB</i> | 8473.00 $\pm$ 58.39      | 8748.50 $\pm$ 268.07    | 8568.12 $\pm$ 336.20    | 8762.73 $\pm$ 259.72    | 9108.88 $\pm$ 177.80    | 8926.75 $\pm$ 209.16    |
| Denitrification             | <i>norC</i> | 1994.67 $\pm$ 93.31      | 2269.25 $\pm$ 58.85     | 2341.12 $\pm$ 93.79     | 2221.18 $\pm$ 90.27     | 2156.12 $\pm$ 83.39     | 2093.75 $\pm$ 45.80     |
| Denitrification             | <i>nosZ</i> | 677798.33 $\pm$ 1407.67  | 671242.75 $\pm$ 2829.26 | 674321.00 $\pm$ 3229.33 | 670681.64 $\pm$ 2378.35 | 666296.25 $\pm$ 2246.15 | 669727.00 $\pm$ 1572.92 |
| Denitrification<br>/Anammox | <i>nirK</i> | 886453.00 $\pm$ 12240.83 | 914175.75 $\pm$ 1711.28 | 910194.25 $\pm$ 2476.18 | 912523.73 $\pm$ 3018.92 | 914077.25 $\pm$ 1595.07 | 913968.50 $\pm$ 487.14  |
| Denitrification<br>/Anammox | <i>nirS</i> | 310908.33 $\pm$ 11689.03 | 290428.50 $\pm$ 1294.60 | 290448.12 $\pm$ 2268.04 | 291626.09 $\pm$ 1545.22 | 293468.50 $\pm$ 1919.42 | 290511.25 $\pm$ 1380.08 |
| Anammox                     | <i>hzo</i>  | 427.67 $\pm$ 21.36       | 404.75 $\pm$ 21.88      | 402.00 $\pm$ 35.10      | 394.73 $\pm$ 46.69      | 388.50 $\pm$ 45.92      | 402.00 $\pm$ 14.72      |
| Anammox                     | <i>hzsA</i> | 312.33 $\pm$ 64.94       | 400.75 $\pm$ 61.84      | 345.00 $\pm$ 28.43      | 348.73 $\pm$ 41.87      | 304.50 $\pm$ 40.10      | 328.25 $\pm$ 65.17      |
| Anammox                     | <i>hzsB</i> | 542.33 $\pm$ 35.22       | 571.00 $\pm$ 34.88      | 612.38 $\pm$ 43.63      | 528.09 $\pm$ 53.88      | 502.25 $\pm$ 33.53      | 532.75 $\pm$ 68.32      |
| Anammox                     | <i>hzsC</i> | 52.33 $\pm$ 1.53         | 64.75 $\pm$ 12.12       | 73.62 $\pm$ 13.21       | 60.91 $\pm$ 10.14       | 59.38 $\pm$ 7.23        | 61.00 $\pm$ 13.49       |

**Table S6 Abundance of nitrogen removal functional genes in sediments of the Eastern China Plain Lakes (continued 1)**

| Metabolic processes         | Genes       | HS                  | TH                  | FB                  | YJ                  | ZS                  | NY                  |
|-----------------------------|-------------|---------------------|---------------------|---------------------|---------------------|---------------------|---------------------|
| Denitrification             | <i>napA</i> | 48196.50 ± 363.00   | 48760.60 ± 450.97   | 46980.00 ± 4030.51  | 50393.00 ± 223.45   | 50596.00 ± 373.35   | 49822.00 ± 574.57   |
| Denitrification             | <i>napB</i> | 1515.50 ± 73.22     | 1453.00 ± 124.84    | 1573.00 ± 128.69    | 1383.00 ± 5.66      | 1424.00 ± 52.33     | 1376.75 ± 49.14     |
| Denitrification             | <i>napC</i> | 2446.25 ± 44.62     | 1993.60 ± 68.26     | 1907.00 ± 48.08     | 2059.00 ± 60.81     | 2097.50 ± 65.76     | 1953.75 ± 29.07     |
| Denitrification             | <i>narG</i> | 10980.00 ± 369.30   | 13586.20 ± 486.57   | 13970.00 ± 890.95   | 13314.50 ± 187.38   | 13623.50 ± 484.37   | 14105.25 ± 604.28   |
| Denitrification             | <i>narH</i> | 10644.75 ± 160.38   | 11200.20 ± 397.78   | 11249.50 ± 188.80   | 11507.50 ± 68.59    | 11365.50 ± 239.71   | 11510.00 ± 193.46   |
| Denitrification             | <i>narI</i> | 5058.75 ± 170.86    | 4816.60 ± 105.08    | 5643.00 ± 1363.30   | 5006.50 ± 277.89    | 4842.50 ± 44.55     | 4790.00 ± 175.88    |
| Denitrification             | <i>narJ</i> | 8416.25 ± 274.67    | 7955.00 ± 316.10    | 8933.00 ± 1216.22   | 8187.50 ± 163.34    | 8129.00 ± 164.05    | 8016.25 ± 265.58    |
| Denitrification             | <i>narV</i> | 116.75 ± 29.35      | 78.00 ± 14.97       | 87.50 ± 27.58       | 89.50 ± 7.78        | 94.00 ± 2.83        | 87.50 ± 13.63       |
| Denitrification             | <i>narW</i> | 6.75 ± 3.30         | 14.60 ± 9.29        | 11.00 ± 2.83        | 16.50 ± 3.54        | 24.50 ± 4.95        | 15.00 ± 6.68        |
| Denitrification             | <i>narY</i> | 3266.50 ± 171.30    | 3516.60 ± 115.06    | 4383.50 ± 1355.52   | 3566.50 ± 2.12      | 3530.00 ± 26.87     | 3428.50 ± 137.95    |
| Denitrification             | <i>narZ</i> | 5409.75 ± 127.60    | 5477.80 ± 69.24     | 6065.50 ± 927.02    | 5651.50 ± 212.84    | 5465.50 ± 62.93     | 5422.25 ± 144.18    |
| Denitrification             | <i>norB</i> | 9261.50 ± 227.52    | 8149.20 ± 191.02    | 8891.50 ± 782.77    | 8813.50 ± 44.55     | 8573.50 ± 47.38     | 8494.00 ± 192.69    |
| Denitrification             | <i>norC</i> | 1992.25 ± 78.91     | 2160.40 ± 63.69     | 2146.00 ± 8.49      | 2107.50 ± 37.48     | 2127.00 ± 22.63     | 2114.25 ± 97.84     |
| Denitrification             | <i>nosZ</i> | 659830.25 ± 3284.00 | 676689.00 ± 1756.60 | 675064.50 ± 48.79   | 673618.50 ± 1364.01 | 673185.00 ± 1195.01 | 674913.00 ± 1763.79 |
| Denitrification<br>/Anammox | <i>nirK</i> | 928947.25 ± 3853.58 | 912091.20 ± 2749.13 | 907288.50 ± 7648.77 | 910326.50 ± 782.77  | 911701.00 ± 1032.38 | 912352.75 ± 1711.05 |
| Denitrification<br>/Anammox | <i>nirS</i> | 289579.50 ± 710.55  | 287630.60 ± 2592.10 | 291651.00 ± 7308.66 | 289722.50 ± 1842.01 | 288933.00 ± 387.49  | 287302.00 ± 599.37  |
| Anammox                     | <i>hzo</i>  | 365.50 ± 46.02      | 413.00 ± 43.97      | 338.00 ± 19.80      | 374.00 ± 16.97      | 379.50 ± 50.20      | 345.25 ± 47.91      |
| Anammox                     | <i>hzsA</i> | 382.25 ± 46.42      | 367.20 ± 19.25      | 307.50 ± 115.26     | 316.50 ± 4.95       | 337.50 ± 36.06      | 365.00 ± 32.35      |
| Anammox                     | <i>hzsB</i> | 598.00 ± 49.20      | 652.80 ± 73.46      | 508.50 ± 84.15      | 550.50 ± 37.48      | 570.50 ± 9.19       | 588.25 ± 59.61      |
| Anammox                     | <i>hzsC</i> | 51.75 ± 10.24       | 60.40 ± 10.06       | 67.50 ± 28.99       | 61.50 ± 13.44       | 67.00 ± 9.90        | 64.25 ± 2.63        |

**Table S6 Abundance of nitrogen removal functional genes in sediments of the Eastern China Plain Lakes (continued 2)**

| Metabolic processes         | Genes       | GC                  | CH                  | PY                  | DH                  | DT                  |
|-----------------------------|-------------|---------------------|---------------------|---------------------|---------------------|---------------------|
| Denitrification             | <i>napA</i> | 50879.00 ± 453.23   | 49039.33 ± 258.51   | 47371.00 ± 1308.43  | 50930.67 ± 56.71    | 52207.33 ± 2240.09  |
| Denitrification             | <i>napB</i> | 1349.33 ± 71.19     | 1427.67 ± 47.77     | 1420.33 ± 77.56     | 1345.00 ± 12.53     | 1114.00 ± 222.28    |
| Denitrification             | <i>napC</i> | 1922.67 ± 75.57     | 2023.50 ± 93.04     | 1808.67 ± 169.11    | 2188.00 ± 49.96     | 1945.00 ± 205.01    |
| Denitrification             | <i>narG</i> | 13270.50 ± 178.38   | 13618.50 ± 204.48   | 13880.33 ± 313.61   | 12767.33 ± 141.30   | 12504.67 ± 778.72   |
| Denitrification             | <i>narH</i> | 11195.17 ± 157.61   | 11453.50 ± 188.80   | 11614.50 ± 164.23   | 11121.33 ± 264.88   | 11350.67 ± 99.17    |
| Denitrification             | <i>narI</i> | 4590.00 ± 100.01    | 4927.67 ± 76.83     | 6071.50 ± 546.44    | 4543.67 ± 85.51     | 4731.33 ± 532.28    |
| Denitrification             | <i>narJ</i> | 7455.33 ± 257.81    | 8287.50 ± 232.10    | 8885.33 ± 184.17    | 7536.00 ± 85.08     | 7256.67 ± 901.60    |
| Denitrification             | <i>narV</i> | 73.17 ± 8.08        | 88.33 ± 13.06       | 79.67 ± 16.44       | 94.67 ± 5.69        | 65.33 ± 11.24       |
| Denitrification             | <i>narW</i> | 9.83 ± 4.83         | 12.67 ± 4.59        | 21.67 ± 9.87        | 10.33 ± 10.07       | 5.00 ± 3.61         |
| Denitrification             | <i>narY</i> | 3381.33 ± 74.75     | 3427.00 ± 148.43    | 3969.33 ± 304.68    | 3427.00 ± 59.10     | 3155.33 ± 235.09    |
| Denitrification             | <i>narZ</i> | 5370.50 ± 101.36    | 5559.17 ± 133.84    | 6259.17 ± 214.84    | 5236.00 ± 95.36     | 5085.67 ± 427.50    |
| Denitrification             | <i>norB</i> | 8467.33 ± 188.90    | 8589.00 ± 219.29    | 8843.67 ± 183.63    | 8441.33 ± 50.52     | 8431.00 ± 233.71    |
| Denitrification             | <i>norC</i> | 2289.17 ± 52.95     | 2116.00 ± 36.09     | 1984.17 ± 62.80     | 2191.33 ± 55.64     | 2045.67 ± 187.77    |
| Denitrification             | <i>nosZ</i> | 673533.00 ± 856.27  | 674087.83 ± 1801.82 | 678937.33 ± 3694.26 | 674010.67 ± 82.55   | 678245.67 ± 837.84  |
| Denitrification<br>/Anammox | <i>nirK</i> | 912031.67 ± 1296.75 | 912893.00 ± 2234.80 | 899444.67 ± 5445.31 | 911445.67 ± 1039.52 | 895386.00 ± 5780.86 |
| Denitrification<br>/Anammox | <i>nirS</i> | 289941.17 ± 1187.09 | 288151.17 ± 1368.76 | 295336.17 ± 2138.34 | 290541.33 ± 1079.92 | 302275.00 ± 6822.62 |
| Anammox                     | <i>hzo</i>  | 389.83 ± 18.48      | 364.83 ± 12.73      | 315.33 ± 45.04      | 383.67 ± 3.21       | 380.00 ± 11.53      |
| Anammox                     | <i>hzsA</i> | 320.17 ± 22.24      | 369.17 ± 39.08      | 267.17 ± 26.27      | 310.33 ± 23.29      | 297.33 ± 32.02      |

|         |             |                |                |                |                |                |
|---------|-------------|----------------|----------------|----------------|----------------|----------------|
| Anammox | <i>hzsB</i> | 528.17 ± 29.87 | 563.00 ± 34.64 | 498.33 ± 37.07 | 470.00 ± 19.70 | 509.67 ± 43.47 |
| Anammox | <i>hzsC</i> | 68.67 ± 10.19  | 67.17 ± 10.36  | 57.67 ± 11.66  | 71.67 ± 9.07   | 74.67 ± 0.58   |

---



**Table S7 Physical parameters of water and sediments in Eastern China**  
**Plain lakes (mean  $\pm$  SE)**

| Lake | WD/m          | SD/cm           | WT/°C          | DO/(mg/L)      | EC/( $\mu$ S/cm)  | pH            | SW/%            |
|------|---------------|-----------------|----------------|----------------|-------------------|---------------|-----------------|
| SB   | 4.2 $\pm$ 0.6 | 11.7 $\pm$ 2.9  | 31.0 $\pm$ 0.2 | 5.3 $\pm$ 0.4  | 160.2 $\pm$ 0.3   | 8.5 $\pm$ 0.1 | 43.0 $\pm$ 12.3 |
| GY   | 3.7 $\pm$ 0.2 | 17.8 $\pm$ 2.1  | 31.3 $\pm$ 0.8 | 5.1 $\pm$ 0.3  | 170.4 $\pm$ 221.7 | 8.5 $\pm$ 0.1 | 50.7 $\pm$ 6.8  |
| HZ   | 2.5 $\pm$ 0.3 | 22.5 $\pm$ 4.1  | 31.8 $\pm$ 0.4 | 5.8 $\pm$ 0.9  | 208.4 $\pm$ 276.6 | 8.8 $\pm$ 0.2 | 53.9 $\pm$ 9.1  |
| LM   | 5.5 $\pm$ 3.9 | 45.5 $\pm$ 13.1 | 31.3 $\pm$ 0.3 | 7.2 $\pm$ 1.7  | 237.8 $\pm$ 249.3 | 8.9 $\pm$ 0.3 | 52.4 $\pm$ 9.7  |
| NS   | 3.0 $\pm$ 0.9 | 65.0 $\pm$ 41.0 | 30.8 $\pm$ 0.6 | 4.9 $\pm$ 1.2  | 236.2 $\pm$ 324.5 | 8.7 $\pm$ 0.3 | 62.3 $\pm$ 12.3 |
| DP   | 4.6 $\pm$ 2.9 | 46.5 $\pm$ 18.9 | 31.0 $\pm$ 0.2 | 7.1 $\pm$ 0.3  | 229.5 $\pm$ 368.6 | 8.8 $\pm$ 0.2 | 57.3 $\pm$ 3.8  |
| HS   | 1.7 $\pm$ 0.3 | 24.0 $\pm$ 1.2  | 30.5 $\pm$ 0.9 | 3.8 $\pm$ 0.9  | 215.1 $\pm$ 195.7 | 8.7 $\pm$ 0.2 | 54.2 $\pm$ 15.6 |
| TH   | 2.3 $\pm$ 0.1 | 38.4 $\pm$ 6.1  | 32.1 $\pm$ 0.9 | 5.3 $\pm$ 0.8  | 359.4 $\pm$ 36.9  | 8.8 $\pm$ 0.3 | 52.6 $\pm$ 6.3  |
| FB   | 3.6 $\pm$ 0.3 | 52.5 $\pm$ 6.4  | 31.3 $\pm$ 0.0 | 6.0 $\pm$ 0.7  | 259.1 $\pm$ 0.4   | 7.9 $\pm$ 0.2 | 43.5 $\pm$ 10.6 |
| YJ   | 6.3 $\pm$ 0.2 | 52.0 $\pm$ 7.1  | 32.0 $\pm$ 0.2 | 8.9 $\pm$ 0.1  | 282.6 $\pm$ 0.6   | 8.8 $\pm$ 0.0 | 62.5 $\pm$ 2.1  |
| ZS   | 5.5 $\pm$ 2.8 | 93.5 $\pm$ 6.4  | 31.8 $\pm$ 0.0 | 8.2 $\pm$ 0.2  | 326.2 $\pm$ 0.1   | 8.8 $\pm$ 0.0 | 55.0 $\pm$ 11.3 |
| NY   | 3.4 $\pm$ 0.5 | 55.2 $\pm$ 5.7  | 35.3 $\pm$ 0.6 | 11.3 $\pm$ 1.3 | 202.9 $\pm$ 5.9   | 9.3 $\pm$ 0.1 | 64.0 $\pm$ 5.9  |
| GC   | 4.2 $\pm$ 0.6 | 79.0 $\pm$ 15.1 | 32.0 $\pm$ 0.3 | 8.0 $\pm$ 0.5  | 276.2 $\pm$ 5.3   | 8.7 $\pm$ 0.1 | 69.5 $\pm$ 6.2  |
| CH   | 4.1 $\pm$ 0.6 | 16.7 $\pm$ 8.8  | 29.2 $\pm$ 0.3 | 6.2 $\pm$ 0.6  | 151.5 $\pm$ 147.3 | 9.3 $\pm$ 0.2 | 64.2 $\pm$ 5.7  |
| PY   | 6.8 $\pm$ 5.2 | 37.5 $\pm$ 5.2  | 32.7 $\pm$ 0.7 | 7.6 $\pm$ 0.4  | 117.9 $\pm$ 18.8  | 7.2 $\pm$ 0.4 | 49.5 $\pm$ 9.5  |
| DH   | 2.8 $\pm$ 0.2 | 53.3 $\pm$ 16.1 | 28.9 $\pm$ 0.8 | 6.8 $\pm$ 0.6  | 401.8 $\pm$ 5.0   | 8.2 $\pm$ 0.3 | 74.0 $\pm$ 3.0  |
| DT   | 6.7 $\pm$ 2.9 | 35.0 $\pm$ 0.0  | 23.6 $\pm$ 0.6 | 6.9 $\pm$ 0.1  | 283.2 $\pm$ 43.7  | 7.4 $\pm$ 0.1 | 30.7 $\pm$ 3.8  |

Note: Water depth (WD), secchi depth (SD), water temperature (WT), dissolved oxygen (DO), electrical conductivity (EC), sediment water content (SW).

## References

- [1] Guo, L.Y., Jiang, Z.H., Li, L., Wang, H.J., 2022. Increase of Future Summer Rainfall in the Middle and Lower Reach of the Yangtze River Basin Projected With a Nonhomogeneous Hidden Markov Model. *Geophysical Research Letters*. 49(7), e2021GL097325.
- [2] Ma, R.H., Duan, H.T., Hu, C.M., Feng, X.Z., Li, A.N., Ju, W.M., Jiang, J.H., Yang, G.S., 2010. A half-century of changes in China's lakes: Global warming or human influence? *Geophysical Research Letters*. 37(24), L24106.
- [3] Wang, J.L., Fu, Z.S., Qiao, H.X., Liu, F.X., 2019. Assessment of eutrophication and water quality in the estuarine area of Lake Wuli, Lake Taihu, China. *Science of the Total Environment*. 650, 1392-1402.
- [4] Wei, J.H., Zhang, Q.J., Yin, Y., Peng, K., Wang, L.C., Cai, Y.J., Gong, Z.J., 2024. Limited Impacts of Water Diversion on Micro-eukaryotic Community along the Eastern Route of China's South-to-North Water Diversion Project. *Water Research*. 262, 122109.
- [5] Zhang, J.J., Zhu, G.H., Yin, J.A., Ma, J., Kong, X.R., 2024. Analysis of summer high temperature observations based on different sub surfaces. *Earth Science Informatics*. 17(6), 5095-5105.
- [6] Zhu, Z., Woodcock, C.E., Holden, C., Yang, Z.Q., 2015. Generating synthetic Landsat images based on all available Landsat data: Predicting Landsat surface reflectance at any given time. *Remote Sensing of Environment*. 162, 67-83.
