# Supplementary material
Source: Copernicus journal article supplement (doi:10.5194/egusphere-2026-2818)

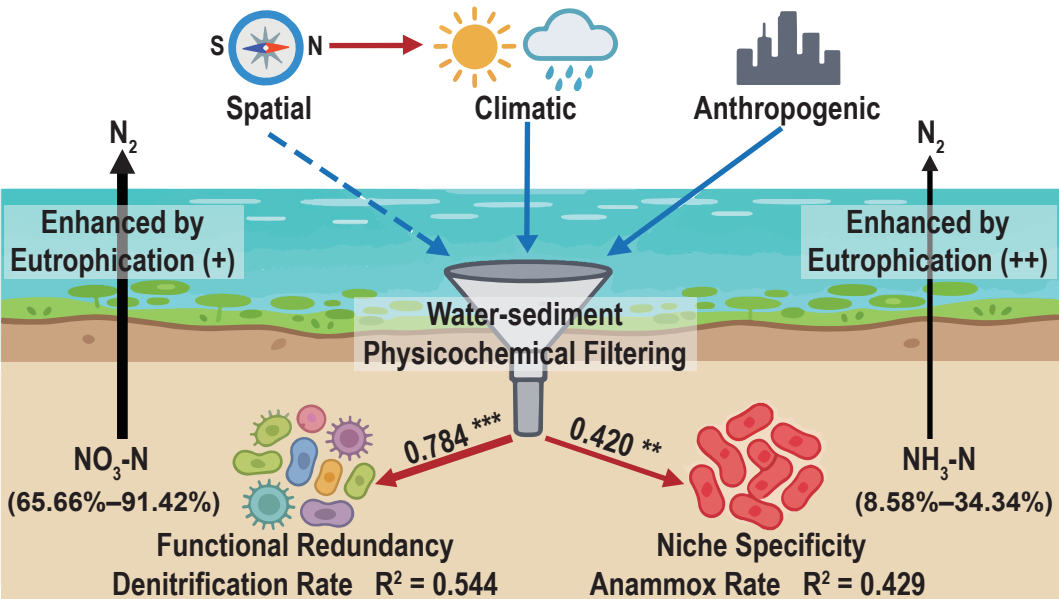

Supplement: Supplementary file 1 [file Graphical Abstract.pdf › Graphical Abstract.pdf]
